# Supplementary material for: Regulation of Heterogenous LexA Expression in Staphylococcus aureus by an Antisense RNA Originating from Transcriptional Read-Through upon Natural Mispairings in the sbrB Intrinsic Terminator
Source: MDPI journal article supplement (doi:10.3390/ijms23010576), 2022-01-05
Supplement: s1 [file s1]

Supplementary Data for

**Regulation of heterogenous LexA expression in *Staphylococcus aureus* by an antisense RNA originating from transcriptional read-through upon natural mispairings in the *sbrB* intrinsic terminator**

Laurène Bastet<sup>1</sup>, Pilar Bustos-Sanmamed<sup>1</sup>, Arancha Catalan-Moreno<sup>1</sup>,  
Carlos J. Caballero<sup>1</sup>, Sergio Cuesta<sup>1</sup>, Leticia Matilla-Cuenca<sup>1</sup>, Maite Villanueva<sup>1</sup>,  
Jaione Valle<sup>1</sup>, Iñigo Lasa<sup>2</sup> and Alejandro Toledo-Arana<sup>1\*</sup>

<sup>1</sup> Instituto de Agrobiotecnología (IdAB). Consejo Superior de Investigaciones Científicas (CSIC)-  
Gobierno de Navarra. 31192-Mutilva, Navarra, Spain.

<sup>2</sup> Laboratory of Microbial Pathogenesis. Navarrabiomed-Universidad Pública de Navarra  
(UPNA)-Complejo Hospitalario de Navarra-IdiSNA. 31008-Pamplona, Navarra, Spain

\* To whom correspondence should be addressed:

Alejandro Toledo-Arana  
E-mail: a.toledo.arana@csic.es  
Phone: +34 948 16 9752  
Instituto de Agrobiotecnología, CSIC-GN  
Avda. de Pamplona 123, 31192-Mutilva, Navarra  
Spain

This PDF file includes:

Supplementary Tables S1 to S5

Supplementary Figures S1 to S7

Supplementary References

Note: Table S5 is provided as a Supplementary Excel file.

**Table S1. Strains used in this study**

| Strains                                       | Relevant characteristic(s)                                                                                      | BGR ID <sup>a</sup> | Reference  |
|-----------------------------------------------|-----------------------------------------------------------------------------------------------------------------|---------------------|------------|
| <b><i>Staphylococcus aureus</i></b>           |                                                                                                                 |                     |            |
| 15981                                         | Wild type (WT) strain. MSSA clinical isolate; biofilm positive.                                                 | 8                   | (1)        |
| MW2                                           | Community-acquired MRSA strain, isolated in 1998 in North Dakota, USA.                                          | 10                  | (2)        |
| $\Delta$ TTsbrB                               | WT strain carrying a deletion of the <i>sbrB</i> transcriptional terminator (TT)                                | 1104                | This study |
| $\Delta$ sigB                                 | WT strain carrying a deletion of the <i>sigB</i> gene                                                           | 178                 | (1)        |
| WT pPsbrB                                     | WT strain carrying the pPsbrB plasmid                                                                           | 168                 | This study |
| $\Delta$ sigB pPsbrB                          | $\Delta$ sigB strain carrying the pPsbrB plasmid                                                                | 170                 | This study |
| WT pPsbrB RT                                  | WT strain carrying the pPsbrB RT plasmid                                                                        | 573                 | This study |
| $\Delta$ sigB pPsbrB RT                       | $\Delta$ sigB strain carrying the pPsbrB RT plasmid                                                             | 665                 | This study |
| WT pTL WT                                     | WT strain carrying the pTL WT plasmid                                                                           | 938                 | This study |
| WT pTL mRBS                                   | WT strain carrying the pTL mRBS plasmid                                                                         | 948                 | This study |
| WT pTL mAUG <sub>1</sub>                      | WT strain carrying the pTL mAUG <sub>1</sub> plasmid                                                            | 1001                | This study |
| WT pTL mAUG <sub>2</sub>                      | WT strain carrying the pTL mAUG <sub>2</sub> plasmid                                                            | 939                 | This study |
| WT pTL mAUG <sub>1+2</sub>                    | WT strain carrying the pTL mAUG <sub>1+2</sub> plasmid                                                          | 1102                | This study |
| WT pTL STOP <sub>34</sub>                     | WT strain carrying the pTL STOP <sub>34</sub> plasmid                                                           | 947                 | This study |
| WT pTL STOP <sub>58</sub>                     | WT strain carrying the pTL STOP <sub>58</sub> plasmid                                                           | 1014                | This study |
| WT pRT WT                                     | WT strain carrying the pRT WT plasmid                                                                           | 322                 | This study |
| WT pRT mRBS                                   | WT strain carrying the pRT mRBS plasmid                                                                         | 905                 | This study |
| WT pRT mAUG <sub>1</sub>                      | WT strain carrying the pRT mAUG <sub>1</sub> plasmid                                                            | 951                 | This study |
| WT pRT mAUG <sub>1+2</sub>                    | WT strain carrying the pRT mAUG <sub>1+2</sub> plasmid                                                          | 1063                | This study |
| WT pRT STOP <sub>34</sub>                     | WT strain carrying the pRT STOP <sub>34</sub> plasmid                                                           | 904                 | This study |
| WT pRT STOP <sub>58</sub>                     | WT strain carrying the pRT STOP <sub>58</sub> plasmid                                                           | 936                 | This study |
| WT pRT 31+TT                                  | WT strain carrying the pRT 31+TT plasmid                                                                        | 937                 | This study |
| WT pRT $\Delta$ TT                            | WT strain carrying the pRT $\Delta$ TT plasmid                                                                  | 895                 | This study |
| A112G                                         | WT strain carrying the A112G substitution in the <i>sbrB</i> TT                                                 | 1151                | This study |
| WT pRT-TT <sub>CON</sub>                      | WT strain carrying the pRT-TT <sub>CON</sub> plasmid                                                            | 943                 | This study |
| WT pRT-V2                                     | WT strain carrying the pRT-V2 plasmid                                                                           | 1035                | This study |
| WT pRT-V3                                     | WT strain carrying the pRT-V3 plasmid                                                                           | 1387                | This study |
| WT pRT-V4                                     | WT strain carrying the pRT-V4 plasmid                                                                           | 1388                | This study |
| WT pRT-V5                                     | WT strain carrying the pRT-V5 plasmid                                                                           | 1034                | This study |
| WT pRT-V6                                     | WT strain carrying the pRT-V6 plasmid                                                                           | 1389                | This study |
| WT pRT-V7                                     | WT strain carrying the pRT-V7 plasmid                                                                           | 1390                | This study |
| WT pRT-TT <sub>tuf</sub>                      | WT strain carrying the pRT-TT <sub>tuf</sub> plasmid                                                            | 1177                | This study |
| WT pRT-S.arg                                  | WT strain carrying the pRT-S.arg plasmid                                                                        | 1084                | This study |
| WT pRT-S.cap                                  | WT carrying the pRT-S.cap plasmid                                                                               | 1068                | This study |
| WT pRT-S.epi                                  | WT strain carrying the pRT-S.epi plasmid                                                                        | 1067                | This study |
| $\Delta$ P <sub>sbrB</sub>                    | WT strain carrying a deletion of the <i>sbrB</i> promoter                                                       | 180                 | This study |
| P <sub>blaZ</sub>                             | WT strain carrying the substitution of the <i>sbrB</i> promoter by the P <sub>blaZ</sub> <sub>+1</sub> promoter | 1483                | This study |
| WT pTT <sub>CON</sub> -PsbrB-PlexA            | WT strain carrying the pTT <sub>CON</sub> -PsbrB-PlexA plasmid                                                  | 999                 | This study |
| WT pTT <sub>15981</sub> -PsbrB-PlexA          | WT strain carrying the pTT <sub>15981</sub> -PsbrB-PlexA plasmid                                                | 955                 | This study |
| WT p $\Delta$ TT <sub>sbrB</sub> -PsbrB-PlexA | WT strain carrying the p $\Delta$ TT <sub>sbrB</sub> -PsbrB-PlexA plasmid                                       | 953                 | This study |
| WT pTT <sub>CON</sub> -PsbrB-PfmtC            | WT strain carrying the pTT <sub>CON</sub> -PsbrB-PfmtC plasmid                                                  | 1178                | This study |
| WT pTT <sub>15981</sub> -PsbrB-PfmtC          | WT strain carrying the pTT <sub>15981</sub> -PsbrB-PfmtC plasmid                                                | 1179                | This study |

Continued in the following page

**Table S1. Continued**

| Strains                                                                 | Relevant characteristic(s)                                                                          | BGR ID <sup>a</sup> | Reference  |
|-------------------------------------------------------------------------|-----------------------------------------------------------------------------------------------------|---------------------|------------|
| WT p $\Delta$ TT <sub>sbrB</sub> -P <sub>sbrB</sub> -P <sub>fmtC</sub>  | WT strain carrying the p $\Delta$ TT <sub>sbrB</sub> -P <sub>sbrB</sub> -P <sub>fmtC</sub> plasmid  | 1181                | This study |
| WT pTT <sub>con</sub> -P <sub>blaZ</sub> -P <sub>lexA</sub>             | WT strain carrying the pTT <sub>con</sub> -P <sub>blaZ</sub> -P <sub>lexA</sub> plasmid             | 1382                | This study |
| WT pTT <sub>15981</sub> pP <sub>blaZ</sub> -P <sub>lexA</sub>           | WT strain carrying the pTT <sub>15981</sub> pP <sub>blaZ</sub> -P <sub>lexA</sub> plasmid           | 1361                | This study |
| WT p $\Delta$ TT <sub>sbrB</sub> -pP <sub>blaZ</sub> -P <sub>lexA</sub> | WT strain carrying the p $\Delta$ TT <sub>sbrB</sub> -pP <sub>blaZ</sub> -P <sub>lexA</sub> plasmid | 1111                | This study |
| WT p $\Delta$ P <sub>sbrB</sub> -TT <sub>15981</sub> P <sub>lexA</sub>  | WT strain carrying the p $\Delta$ P <sub>sbrB</sub> -TT <sub>15981</sub> P <sub>lexA</sub> plasmid  | 957                 | This study |
| WT pP <sub>sbrB</sub> -che-TT <sub>con</sub> -gfp                       | WT strain carrying the pP <sub>sbrB</sub> -che-TT <sub>con</sub> -gfp plasmid                       | 1424                | This study |
| WT pP <sub>sbrB</sub> -che-TT <sub>15981</sub> -gfp                     | WT strain carrying the pP <sub>sbrB</sub> -che-TT <sub>15981</sub> -gfp plasmid                     | 1423                | This study |
| WT pP <sub>sbrB</sub> -che-TT1828 <sub>con</sub> -gfp                   | WT strain carrying the pP <sub>sbrB</sub> -che-TT1828 <sub>con</sub> -gfp plasmid                   | 1528                | This study |
| WT pP <sub>sbrB</sub> -che-TT1828 <sub>15981</sub> -gfp                 | WT strain carrying the pP <sub>sbrB</sub> -che-TT1828 <sub>15981</sub> -gfp plasmid                 | 1527                | This study |
| WT pP <sub>sbrB</sub> -che-TT1828 <sub>res</sub> -gfp                   | WT strain carrying the pP <sub>sbrB</sub> -che-TT1828 <sub>res</sub> -gfp plasmid                   | 1705                | This study |
| WT pP <sub>sbrB</sub> -che-TT1022 <sub>con</sub> -gfp                   | WT strain carrying the pP <sub>sbrB</sub> -che-TT1022 <sub>con</sub> -gfp plasmid                   | 1557                | This study |
| WT pP <sub>sbrB</sub> -che-TT1022 <sub>res</sub> -gfp                   | WT strain carrying the pP <sub>sbrB</sub> -che-TT1022 <sub>res</sub> -gfp plasmid                   | 1558                | This study |
| WT pP <sub>sbrB</sub> -che-TT619 <sub>con</sub> -gfp                    | WT strain carrying the pP <sub>sbrB</sub> -che-TT619 <sub>con</sub> -gfp plasmid                    | 1793                | This study |
| WT pP <sub>sbrB</sub> -che-TT619 <sub>res</sub> -gfp                    | WT strain carrying the pP <sub>sbrB</sub> -che-TT619 <sub>res</sub> -gfp plasmid                    | 1801                | This study |
| <b><i>Escherichia coli</i></b>                                          |                                                                                                     |                     |            |
| XL1-Blue                                                                | Strain used for cloning experiments                                                                 | 1                   | Stratagene |

<sup>a</sup> Identification number of the strains stored at the Laboratory of Bacterial Gene Regulation

**Table S2. Plasmids used in this study**

| Plasmids                | Relevant characteristic(s)                                                                                                                                                                                                          | Reference  |
|-------------------------|-------------------------------------------------------------------------------------------------------------------------------------------------------------------------------------------------------------------------------------|------------|
| pMAD                    | <i>E. coli</i> - <i>S. aureus</i> shuttle vector with a thermosensitive origin of replication for Gram-positive bacteria. Amp <sup>R</sup> , Erm <sup>R</sup>                                                                       | (3)        |
| pMAD-A112G              | pMAD containing the allele for introducing the A122G substitution in the <i>sbrB</i> TT                                                                                                                                             | This study |
| pMAD-ΔTT                | pMAD containing the allele for deletion of the <i>sbrB</i> TT                                                                                                                                                                       | This study |
| pCN57                   | <i>E. coli</i> - <i>S. aureus</i> shuttle vector to express genes under the control of the <i>PblaZ</i> promoter and for transcriptional fusions with <i>gfp</i> reporter gene. Low copy number. Amp <sup>R</sup> -Erm <sup>R</sup> | (4)        |
| pCN57- <i>sbrB</i>      | pCN57 plasmid expressing the <i>sbrB</i> mRNA                                                                                                                                                                                       | This study |
| pCN57+1                 | pCN57 plasmid carrying the modified <i>PblaZ</i> promoter region to express mRNAs from their native transcriptional start site.                                                                                                     | This study |
| pCN57+1- <i>sbrB</i>    | pCN57+1 plasmid expressing the <i>sbrB</i> mRNA                                                                                                                                                                                     | This study |
| pCN47                   | <i>E. coli</i> - <i>S. aureus</i> shuttle vector. Low copy number. Amp <sup>R</sup> -Erm <sup>R</sup>                                                                                                                               | (4)        |
| pHRG                    | pCN47 plasmid carrying the <i>Phyper</i> constitutive promoter, <i>icaR</i> RBS and the <i>gfp</i> reporter gene                                                                                                                    | (5)        |
| pHRR                    | pCN47 plasmid carrying the <i>Phyper</i> constitutive promoter, <i>icaR</i> RBS and the <i>mCherry</i> reporter gene                                                                                                                | This study |
| pCN56                   | <i>E. coli</i> - <i>S. aureus</i> shuttle vector used for transcriptional fusions with the <i>gfp</i> reporter. High copy number. Amp <sup>R</sup> -Erm <sup>R</sup>                                                                | (4)        |
| pAD-cGFP                | pPL2- <i>Phyper</i> -GFP                                                                                                                                                                                                            | (6)        |
| pPsbrB                  | pCN47 plasmid carrying the <i>sbrB</i> promoter fused to the <i>gfp</i> reporter gene                                                                                                                                               | This study |
| pPsbrB RT               | pCN57 plasmid expressing the <i>sbrB</i> mRNA under the control of its own promoter and cloned upstream the <i>gfp</i> reporter gene                                                                                                | This study |
| pTL WT                  | pHRG plasmid in which <i>Phyper</i> was replaced by <i>Pblaz+1</i> and the <i>sbrB</i> coding sequence was fused to the ATG-less <i>gfp</i> reporter gene                                                                           | This study |
| pTL mRBS                | pTL WT plasmid where the guanines at position 5 and 6 were substituted by cytosines.                                                                                                                                                | This study |
| pTL mAUG <sub>1</sub>   | pTL WT plasmid where the thymine at position 20 was substituted by an adenine.                                                                                                                                                      | This study |
| pTL mAUG <sub>2</sub>   | pTL WT plasmid where the thymine at position 23 was substituted by an adenine.                                                                                                                                                      | This study |
| pTL mAUG <sub>1+2</sub> | pTL WT plasmid where the thymines at position 20 and 23 were substituted by adenines.                                                                                                                                               | This study |
| pTL STOP <sub>34</sub>  | pTL WT plasmid where the adenine at position 34 was substituted by a thymine.                                                                                                                                                       | This study |
| pTL STOP <sub>58</sub>  | pTL WT plasmid where the guanine at position 58 was substituted by a thymine.                                                                                                                                                       | This study |
| pRT WT                  | pCN57+1 plasmid expressing the <i>sbrB</i> mRNA                                                                                                                                                                                     | This study |
| pRT mRBS                | pRT WT plasmid where the guanines at position 5 and 6 were substituted by cytosines.                                                                                                                                                | This study |
| pRT mAUG <sub>1</sub>   | pRT WT plasmid where the thymine at position 20 was substituted by an adenine.                                                                                                                                                      | This study |
| pRT mAUG <sub>1+2</sub> | pRT WT plasmid where the thymines at position 20 and 23 were substituted by adenines.                                                                                                                                               | This study |
| pRT STOP <sub>34</sub>  | pRT WT plasmid where the adenine at position 34 was substituted by a thymine.                                                                                                                                                       | This study |
| pRT STOP <sub>58</sub>  | pRT WT plasmid where the guanine at position 58 was substituted by a thymine.                                                                                                                                                       | This study |

Continued in the following page

**Table S2. Continued**

| Plasmids                                    | Relevant characteristic(s)                                                                                                                                                                                                                                                                                                                                                                                                   | Reference  |
|---------------------------------------------|------------------------------------------------------------------------------------------------------------------------------------------------------------------------------------------------------------------------------------------------------------------------------------------------------------------------------------------------------------------------------------------------------------------------------|------------|
| pRT 31+TT                                   | pRT WT with an insertion of 31 nt between the STOP codon and the TT                                                                                                                                                                                                                                                                                                                                                          | This study |
| pRT $\Delta$ TT                             | pRT WT plasmid where the <i>sbrB</i> TT has been deleted                                                                                                                                                                                                                                                                                                                                                                     | This study |
| pRT-TT <sub>CON</sub>                       | pCN57 <sub>+1</sub> plasmid carrying the <i>sbrB</i> mRNA and the MW2 <i>sbrB</i> TT                                                                                                                                                                                                                                                                                                                                         | This study |
| pRT-V2                                      | pCN57 <sub>+1</sub> plasmid carrying the <i>sbrB</i> mRNA and the V2 <i>sbrB</i> TT                                                                                                                                                                                                                                                                                                                                          | This study |
| pRT-V3                                      | pCN57 <sub>+1</sub> plasmid carrying the <i>sbrB</i> mRNA and the V3 <i>sbrB</i> TT                                                                                                                                                                                                                                                                                                                                          | This study |
| pRT-V4                                      | pCN57 <sub>+1</sub> plasmid carrying the <i>sbrB</i> mRNA and the V4 <i>sbrB</i> TT                                                                                                                                                                                                                                                                                                                                          | This study |
| pRT-V5                                      | pCN57 <sub>+1</sub> plasmid carrying the <i>sbrB</i> mRNA and the V5 <i>sbrB</i> TT                                                                                                                                                                                                                                                                                                                                          | This study |
| pRT-V6                                      | pCN57 <sub>+1</sub> plasmid carrying the <i>sbrB</i> mRNA and the V6 <i>sbrB</i> TT                                                                                                                                                                                                                                                                                                                                          | This study |
| pRT-V7                                      | pCN57 <sub>+1</sub> plasmid carrying the <i>sbrB</i> mRNA and the V7 <i>sbrB</i> TT                                                                                                                                                                                                                                                                                                                                          | This study |
| pRT-TT <sub>tuf</sub>                       | pCN57 <sub>+1</sub> plasmid carrying the <i>sbrB</i> mRNA in which the <i>sbrB</i> TT was substituted by the <i>tuf</i> TT                                                                                                                                                                                                                                                                                                   | This study |
| pRT-S.arg                                   | pCN57 <sub>+1</sub> plasmid carrying the <i>sbrB</i> mRNA, whose sequence was cloned from the <i>S. argenteus</i> MSHR1132 genome                                                                                                                                                                                                                                                                                            | This study |
| pRT-S.cap                                   | pCN57 <sub>+1</sub> plasmid carrying the <i>sbrB</i> mRNA, whose sequence was cloned from the <i>S. capitis</i> SK14 genome                                                                                                                                                                                                                                                                                                  | This study |
| pRT-S.epi                                   | pCN57 <sub>+1</sub> plasmid carrying the <i>sbrB</i> mRNA, whose sequence was cloned from the <i>S. epidermidis</i> RP62A genome                                                                                                                                                                                                                                                                                             | This study |
| pMAD_ $\Delta$ PsbrB                        | pMAD containing the allele for deletion of the <i>sbrB</i> promoter                                                                                                                                                                                                                                                                                                                                                          | This study |
| pMAD_PblaZ <sub>+1</sub>                    | pMAD containing the allele for substitution of the <i>sbrB</i> promoter by P <sub>blaZ+1</sub>                                                                                                                                                                                                                                                                                                                               | This study |
| pTT <sub>con</sub> <sup>-</sup> PsbrB-PlexA | pCN56 plasmid carrying a dual fluorescent reporter that mimics the <i>sbrB-lexA-sosA</i> region to simultaneously monitor the expression of LexA and <i>lexA</i> -asRNA. The <i>lexA</i> and <i>sosA</i> genes were replaced by the <i>mcherry</i> and <i>gfp</i> , respectively. The PsosA promoter was excluded to only monitor the <i>lexA</i> -asRNA expression. This construction includes the consensus <i>sbrB</i> TT | This study |
| pTT <sub>15981</sub> -PsbrB-PlexA           | pTT <sub>con</sub> <sup>-</sup> PsbrB-PlexA carrying the 15981 <i>sbrB</i> TT instead of the consensus <i>sbrB</i> TT                                                                                                                                                                                                                                                                                                        | This study |
| p $\Delta$ TT <sub>sbrB</sub> -PsbrB-PlexA  | pTT <sub>con</sub> <sup>-</sup> PsbrB-PlexA carrying a deletion of the <i>sbrB</i> TT                                                                                                                                                                                                                                                                                                                                        | This study |
| pTT <sub>con</sub> <sup>-</sup> PsbrB-PfmtC | pTT <sub>con</sub> <sup>-</sup> PsbrB-PlexA carrying the PfmtC promoter instead of the LexA promoter                                                                                                                                                                                                                                                                                                                         | This study |
| pTT <sub>15981</sub> -PsbrB-PfmtC           | pTT <sub>con</sub> <sup>-</sup> PsbrB-PlexA carrying the 15981 <i>sbrB</i> TT instead of the consensus <i>sbrB</i> TT and the PfmtC promoter instead of the LexA promoter                                                                                                                                                                                                                                                    | This study |
| p $\Delta$ TT <sub>sbrB</sub> -PsbrB-PfmtC  | pTT <sub>con</sub> <sup>-</sup> PsbrB-PlexA carrying a deletion of the <i>sbrB</i> TT and the PfmtC promoter instead of the LexA promoter                                                                                                                                                                                                                                                                                    | This study |
| pTT <sub>con</sub> <sup>-</sup> PblaZ-PlexA | pTT <sub>con</sub> <sup>-</sup> PsbrB-PlexA carrying PblaZ promoter instead of the <i>sbrB</i> promoter                                                                                                                                                                                                                                                                                                                      | This study |
| pTT <sub>15981</sub> -PblaZ-PlexA           | pTT <sub>con</sub> <sup>-</sup> PsbrB-PlexA carrying the 15981 <i>sbrB</i> TT instead of the consensus <i>sbrB</i> TT and the PblaZ promoter instead of the <i>sbrB</i> promoter                                                                                                                                                                                                                                             | This study |
| p $\Delta$ TT <sub>sbrB</sub> -pPblaZ PlexA | pTT <sub>con</sub> <sup>-</sup> PsbrB-PlexA carrying the <i>sbrB</i> TT deletion and the PblaZ promoter instead of the <i>sbrB</i> promoter                                                                                                                                                                                                                                                                                  | This study |
| p $\Delta$ PsbrB- TT <sub>15981</sub> PlexA | p $\Delta$ PsbrB- TT <sub>15981</sub> PlexA carrying the P <sub>sbrB</sub> promoter deletion and the 15981 <i>sbrB</i> TT instead of the consensus <i>sbrB</i> TT                                                                                                                                                                                                                                                            | This study |

Continued in the following page

**Table S2. Continued**

| Plasmids                                | Relevant characteristic(s)                                                                                                                                                                                                                                                                                                                                        | Reference  |
|-----------------------------------------|-------------------------------------------------------------------------------------------------------------------------------------------------------------------------------------------------------------------------------------------------------------------------------------------------------------------------------------------------------------------|------------|
| pPsbrB-che-TT <sub>con</sub> -gfp       | pCN56 plasmid including a dual fluorescent reporter system monitoring transcriptional terminator read-through. The expression of mCherry and GFP indicates the levels of transcript upstream and downstream of selected TTs, respectively. The system is under the control of the P <sub>sbrB</sub> promoter. This construct carries the consensus <i>sbrB</i> TT | This study |
| pPsbrB-che-TT <sub>15981</sub> -gfp     | pPsbrB-che-TT <sub>con</sub> -gfp carrying the 15981 <i>sbrB</i> TT instead of the consensus <i>sbrB</i> TT                                                                                                                                                                                                                                                       | This study |
| pΔPsbrB-che-TT <sub>15981</sub> -gfp    | pPsbrB-che-TT <sub>con</sub> -gfp carrying the <i>sbrB</i> promoter deletion and the 15981 <i>sbrB</i> TT instead of the consensus <i>sbrB</i> TT                                                                                                                                                                                                                 | This study |
| pPsbrB-che-TT1828 <sub>15981</sub> -gfp | pPsbrB-che-TT <sub>con</sub> -gfp carrying TT1828 from <i>S. aureus</i> 15981 instead of the consensus <i>sbrB</i> TT                                                                                                                                                                                                                                             | This study |
| pPsbrB-che-TT1828 <sub>res</sub> -gfp   | pPsbrB-che-TT <sub>con</sub> -gfp carrying the mispairing-restored TT1828 instead of the consensus <i>sbrB</i> TT                                                                                                                                                                                                                                                 | This study |
| pPsbrB-che-TT1022 <sub>con</sub> -gfp   | pPsbrB-che-TT <sub>con</sub> -gfp carrying consensus TT1022 instead of the consensus <i>sbrB</i> TT                                                                                                                                                                                                                                                               | This study |
| pPsbrB-che-TT1022 <sub>res</sub> -gfp   | pPsbrB-che-TT <sub>con</sub> -gfp carrying the mispairing-restored TT1022 instead of the consensus <i>sbrB</i> TT                                                                                                                                                                                                                                                 | This study |
| pPsbrB-che-TT619 <sub>con</sub> -gfp    | pPsbrB-che-TT <sub>con</sub> -gfp carrying consensus TT619 instead of the consensus <i>sbrB</i> TT                                                                                                                                                                                                                                                                | This study |
| pPsbrB-che-TT619 <sub>res</sub> -gfp    | pPsbrB-che-TT <sub>con</sub> -gfp carrying the mispairing-restored TT619 instead of the consensus <i>sbrB</i> TT                                                                                                                                                                                                                                                  | This study |

**Table S3.** Oligonucleotides used in this study

| Oligonucleotide name                                                                                  | Sequence <sup>a</sup>                                                           |
|-------------------------------------------------------------------------------------------------------|---------------------------------------------------------------------------------|
| <b>Construction of the pMAD plasmid for <i>sbrB</i> TT deletion</b>                                   |                                                                                 |
| LB108                                                                                                 | CCCGGGCGACGGTATTTTATGATAAGCATC                                                  |
| LB17                                                                                                  | GTTACACAAATTAACCATTATTATTTTTCTTTCTTTTATTAAG                                     |
| LB18                                                                                                  | AAAAATAATAATGGTTTTAATTTGTGTAACATTTTGCAGAAATC                                    |
| LB109                                                                                                 | GGATCCCAATTTACCTAGACAATGTTGC                                                    |
| <b>Construction of the pMAD plasmid for A112G mutation</b>                                            |                                                                                 |
| LB108                                                                                                 | CCCGGGCGACGGTATTTTATGATAAGCATC                                                  |
| LB109                                                                                                 | GGATCCCAATTTACCTAGACAATGTTGC                                                    |
| LB128                                                                                                 | GGCTCGCTCCTGTAAATTATTACGGGGGCG                                                  |
| LB129                                                                                                 | AATAATTACAGGAGCGAGCCATTATTATTTTTTTC                                             |
| <b>Construction of the pMAD plasmid for deletion of <i>sbrB</i> promoter</b>                          |                                                                                 |
| PSigB_LexA_A                                                                                          | GGATCCGTAGAGTGCGTTACGAACAA                                                      |
| PSigB_LexA_B                                                                                          | GCGGCCGCTTAACCAAGTATAATTTCTGTCC                                                 |
| PSigB_LexA_C_SacI                                                                                     | GCCGGCGACTTGAACGCGTCAAA                                                         |
| PSigB_LexA_D                                                                                          | CCATGGGTCAAACCATAGCAGAAAAT                                                      |
| PSigB_LexA_E                                                                                          | ATACAATACACCTAAATCGG                                                            |
| <b>Construction of the pMAD plasmid for substituting <i>sbrB</i> promoter by <i>blaZ</i> promoter</b> |                                                                                 |
| LB108                                                                                                 | CCCGGGCGACGGTATTTTATGATAAGCATC                                                  |
| LB110                                                                                                 | GATATTACAATTGTAATATTATGAATTCGTAAGGAAGTAGATAAACATGATGAC                          |
| LB111                                                                                                 | ATAATATTACAATTGTAATATCGGTGTCAAT                                                 |
| LB109                                                                                                 | GGATCCCAATTTACCTAGACAATGTTGC                                                    |
| <b>Construction of pCN57-<i>sbrB</i> plasmid</b>                                                      |                                                                                 |
| LB35                                                                                                  | CTGCAGTGTAAGGAAGTAGATAAACATGATGAC                                               |
| LB12                                                                                                  | CCCGGGATATAAATTTTGAATTACAGATTCTGC                                               |
| <b>mRACE</b>                                                                                          |                                                                                 |
| LB75-OP-A                                                                                             | CTTGAACGCGTCAAAGATATAC                                                          |
| LB76-OP-B                                                                                             | ATATCCGCATCTTTTGTTTATC                                                          |
| <b>Construction of pCN57-<sub>+1</sub> plasmid</b>                                                    |                                                                                 |
| LB51                                                                                                  | GCATGCAGCTTACTATGCCATTATTAATAACTTAG                                             |
| LB106                                                                                                 | ACCCGGGGATCCTCTAGAGTCGACGAATTCATAATATTACAATTGTAATATCGGTG<br>TCAA                |
| LB73                                                                                                  | GAATTCGTCGACTCTAGAGGATCCCCGGGTACCGAGCTCCGTAACTAATTAATT<br>TAAGAAGGAGATATACATATG |
| LB74                                                                                                  | AAGTGTGGCCATGGAACAG                                                             |
| <b>Construction of pCN57-<sub>+1</sub>-<i>sbrB</i> plasmid</b>                                        |                                                                                 |
| LB88                                                                                                  | GAATTCTAAGGAAGTAGATAAACATGATGACAAC                                              |
| LB12                                                                                                  | CCCGGGATATAAATTTTGAATTACAGATTCTGC                                               |
| <b>Construction of pPsbrB and pPsbrB RT plasmids</b>                                                  |                                                                                 |
| Sall_sigB_prom                                                                                        | GTCGACAATTATACTGGTTAATGTTTTGGCATGAGATTAAAGGGTAATGTTTGTG<br>ATAAAGCAAGCATATAATAT |
| BamHI_GFP_end                                                                                         | GGATCCTTATTTGTATAGTTCATCCATGCCAT                                                |
| LB1                                                                                                   | GCATGCAATTATACTGGTTAATGTTTTGGCATG                                               |
| LB12                                                                                                  | CCCGGGATATAAATTTTGAATTACAGATTCTGC                                               |

Continued in the following page

**Table S3. Continued**

| Oligonucleotide name                                                                                      | Sequence <sup>a</sup>                                                   |
|-----------------------------------------------------------------------------------------------------------|-------------------------------------------------------------------------|
| <b>Construction of pTL plasmids carrying <i>sbrB</i> and its mutants</b>                                  |                                                                         |
| LB51                                                                                                      | GCATGCAGCTTACTATGCCATTATTAATAACTTAG                                     |
| LB2                                                                                                       | ACTAGTTTTTTTTCTTTCTTTTTATTAAGTATATCTTTGAC                               |
| LB102                                                                                                     | GAATTCGTAACCAAGTAGATAAACATGATGACAACAG                                   |
| LB118                                                                                                     | ACTAGTCATCTTGTTTATCTACTTCCTTAC                                          |
| LB119                                                                                                     | ACTAGTCATCTTGTTTATCTACTTCCTTAC                                          |
| LB6                                                                                                       | CTGTTGTCTTCTTGTTTATCTACTTCCTTACAGAC                                     |
| LB5                                                                                                       | AGTAGATAAACAAAGAAGACAACAGATAAACCAAAAG                                   |
| LB41                                                                                                      | CATGATGACAACAGATTAACCAAAAGATGCGGATAT                                    |
| LB42                                                                                                      | CTTTTGGTTAATCTGTTGTCATCATGTTTATCTACTT                                   |
| LB56                                                                                                      | CGCGTCAAAGATATACTTAATAAAAAAG                                            |
| LB74                                                                                                      | AAGTGTGGCCATGGAACAG                                                     |
| LB11                                                                                                      | TTCTTTCTTTTTATTAAGTATATCTTTGACGCGTTAAAGTATATCCGCATCTTTTG                |
| <b>Construction of the pRT plasmids carrying <i>sbrB</i> and its mutants</b>                              |                                                                         |
| LB101                                                                                                     | GAATTCGTAAGGAAGTAGATAAACATGATGACAAC                                     |
| LB12                                                                                                      | CCCGGGATATAAATTTTGAATTACAGATTTCTGC                                      |
| LB102                                                                                                     | GAATTCGTAACCAAGTAGATAAACATGATGACAACAG                                   |
| LB112                                                                                                     | GAATTCGTAAGGAAGTAGATAAACAGATGACAACAG                                    |
| LB113                                                                                                     | GAATTCGTAAGGAAGTAGATAAACAAAGAAGACAACAGATAAAC                            |
| pCN_Univ_fw_AT                                                                                            | CCGTATTACCGCCTTTGAGTG                                                   |
| LB62                                                                                                      | AAACGTGCTTATATTTTATCGATAATACAACCATTATTATTTTTCTTTCTTTTTTA<br>TTAAGTATATC |
| LB61                                                                                                      | TTGTATTATCGATAAAAAATAAGCACGTTTCTCACTCCTGTAAATTATTACGG                   |
| LB17                                                                                                      | GTTACACAAATTAACCATTATTATTTTTCTTTCTTTTTTATTAAG                           |
| LB18                                                                                                      | AAAAATAATAATGGTTTAAATTTGTGAACATTTTGCAGAAATC                             |
| <b>Construction of the pRT plasmids carrying <i>sbrB</i> TT and its variants</b>                          |                                                                         |
| LB101                                                                                                     | GAATTCGTAAGGAAGTAGATAAACATGATGACAAC                                     |
| LB12                                                                                                      | CCCGGGATATAAATTTTGAATTACAGATTTCTGC                                      |
| LB128                                                                                                     | GGCTCGCTCCTGTAAATTATTACGGGGGCG                                          |
| LB129                                                                                                     | AATAATTACAGGAGCGAGCCATTATTATTTTTTC                                      |
| LB124                                                                                                     | CCGTAATAATTTACAAGAGCGAGCCATTATTATTTT                                    |
| LB125                                                                                                     | GCTCTTGTAATTTATTACGGGGGCGAGTTTAAATTTGTGT                                |
| LB196                                                                                                     | TCGCCTCCGTAATAATTTACAGGAG                                               |
| LB197                                                                                                     | GTAAATTATTACGGAGGCGAGTTTAAATTTGTGTAAC                                   |
| LB194                                                                                                     | CCCCGTAATAATTTACAGGAGC                                                  |
| LB195                                                                                                     | GCTCCTGTAAATTATTACGGGGGCGAGTTTAAATTTGTGTAACATTTTG                       |
| LB122                                                                                                     | CCCCCGTAATAATTTACAGGAG                                                  |
| LB123                                                                                                     | GTAAATTATTACGGGGGCGAGTTTAAATTTG                                         |
| LB192                                                                                                     | TGCCCCGTAATAATTTACAAGAGCGAGCCATTATTATTTTTTC                             |
| LB193                                                                                                     | TTGTAAATTATTACGGGGGCAAGTTTAAATTTGTGTAACATTTTGC                          |
| LB198                                                                                                     | CACAAATTAATTCGCCCCGTAATAATTTA                                           |
| LB199                                                                                                     | GGGGCGAATTTTAAATTTGTGTAACATTTTGCAG                                      |
| LB66                                                                                                      | GATCCCTCAATCGAGGGGTCTTTTTTAAATTTGTGTAACATTTTGCAGAA<br>AT                |
| LB67                                                                                                      | AAAAAAGACCCCTCGATTGAGGGATCCCATTATTATTTTTCTTTCTTT<br>TTTATTAAGTATATCT    |
| <b>Construction of the pRT plasmids carrying <i>sbrB</i> from different <i>Staphylococcus</i> species</b> |                                                                         |
| LB136                                                                                                     | GAATTCGTAAGGATGTAGATAAATATGAAGCAAAAA                                    |
| LB137                                                                                                     | CCCGGGTTTAAAGTGTAGGCCTCCTTATATTTT                                       |
| LB138                                                                                                     | GAATTCGTAAGGATGTAGATAAGCATGAAAAAC                                       |
| LB139                                                                                                     | CCCGGGAGCCCTCCTATATCAAGAC                                               |
| LB140                                                                                                     | GAATTCGTAAGGAAGTAGATAAACATGATGAT                                        |
| LB141                                                                                                     | CCCGGGTGTTACAACACTAGAAACAATCAGA                                         |

Continued in the following page



**Table S3. Continued**

| Oligonucleotide name                                                                     | Sequence <sup>a</sup>                                                                     |
|------------------------------------------------------------------------------------------|-------------------------------------------------------------------------------------------|
| <b>Construction of the pCN56 reporter plasmids</b>                                       |                                                                                           |
| LB114                                                                                    | CTCGGTACCTTAACGAACAAATGTTTGGTTTCAAATTAATGATAT<br>ACTGTATTTAGTAGGGGGTTATAAAAAATGACTAG      |
| LB93                                                                                     | GGATCCTTATTTGTATAATTCATCCATACCACCAG                                                       |
| LB1                                                                                      | GCA TGCAATTATACTGGTTAATGTTTTGGCATG                                                        |
| LB92                                                                                     | GGATCCTATTTTAAACCGTTATATATTATCGTAATTGTTAAG                                                |
| LB154                                                                                    | TTATCTTCTTCACCTTTACTAGTCATTTTTATAACCCCTACTTTATTTCT<br>GTTATAAATCAAAATATATCATATAAAC        |
| LB155                                                                                    | GTTAACGGAGCTCGGTACCGTTATATAAATCAAAGGTAATGATATGCT<br>ATTTTATGGTTTATATGATATATTTTGATTATAACAG |
| LB129                                                                                    | AATAATTACAGGAGCGAGCCATTATTATTTTTTTTC                                                      |
| LB128                                                                                    | GGCTCGCTCCTGTAAATTATTACGGGGGCG                                                            |
| LB17                                                                                     | GTTACACAAATTAACCATTTATTATTTTTTTCTTTCTTTTTTATTAAG                                          |
| LB18                                                                                     | AAAAATAATAATGGTTTTAATTTGTGTAACATTTTGCAGAAATC                                              |
| LB128                                                                                    | GGCTCGCTCCTGTAAATTATTACGGGGGCG                                                            |
| <b>Construction of the pCN56 reporter plasmid expressing the <i>sbrB</i> terminators</b> |                                                                                           |
| LB64                                                                                     | GCA TGCTTTGTCTGTAAGGAAGTAGATAAACATG                                                       |
| LB92                                                                                     | GGATCCTATTTTAAACCGTTATATATTATCGTAATTGTTAAG                                                |
| LB159                                                                                    | GGATCCGTAAGGAAGTAGATAAACATGATGACA                                                         |
| LB160                                                                                    | ATTTAGAATAGGCGCGCCTTA                                                                     |
| LB190                                                                                    | AATGCCTAGGATCCTAATGGCTCGCTCCTGTAAATTATTACGGGGGCGA<br>GTTTTAATTTGTGTAACATTTTGCAG           |
| LB189                                                                                    | TAACGGAGCTCGGTACCCGGGATATAAATTTGAATTACAGATTTCTGC<br>AAAATGTTACACAAAT                      |
| TERM1828_BamHI_fw                                                                        | GGATCCAATAATATAAGTATGACTAAAGCCAC                                                          |
| TERM1828_SmaI_rev                                                                        | CCCGGGCCCTAACTCCCCACAAAT                                                                  |
| TERM1828_con_fw                                                                          | GGATCCAATAATATAAGTATGACTAAAGCCACATCCAATATAGGACGTG<br>GCTTTT                               |
| TERM1828_res_fw                                                                          | GGATCCAATAATATAAGTATGACTAAAGCCACGTCCAATATAGGACGTG<br>GCTTTT                               |
| TERM1022_rev                                                                             | GCCAAGCTAAAGGTAAAGG                                                                       |
| TERM1022_KpnI                                                                            | GGTACCCGGACCACACCTCTAAAAAAGC                                                              |
| TERM1022_res_fw                                                                          | GGTACCCGGACCACACCTCTAAAAAAGCGTAGGTTAATTTAACCT                                             |
| TERM619_BamHI                                                                            | GGATCCGAAGATATCTTCGGTAAAGTGG                                                              |
| TERM619_SmaI                                                                             | CCCGGGCCTTTAAATAAATAAGTTAAGTACAAAC                                                        |
| TERM619_res                                                                              | GGATCCGAAGATATCTTCGGTAAAGTGGCAATTTAAATTGCTTAGTG<br>AGACCTATGCTATTTAT                      |
| <b>Construction of probes for the Northern blot assays</b>                               |                                                                                           |
| LB77                                                                                     | TTACATTTGCGGTACAAAC                                                                       |
| LB78                                                                                     | TAATACGACTCACTATAGGGTTGTAAGTGATCAAACAAATG                                                 |
| LB79                                                                                     | TTGTAAGTGATCAAACAAATG                                                                     |
| LB80                                                                                     | TAATACGACTCACTATAGGGTTACATTTGCGGTACAAAC                                                   |
| sosA fw1                                                                                 | CTAGGAGTGAAAATGATG                                                                        |
| sosA T7                                                                                  | TAATACGACTCACTATAGGGGACAATGTATCAATTTATTAAAGC                                              |
| sRNA antilexA T7                                                                         | AATACGACTCACTATAGGGAAATTAATACTCGCCCCCG                                                    |
| sRNA antilexA fw2                                                                        | TGAACGCGTCAAAGATATACTT                                                                    |

<sup>a</sup>Restriction enzymes are indicated in *italic*

**Table S4.** Summary of TT<sub>SbrB</sub> variants found in *S. aureus* strains

| Variant | Mutation    | Consequence               | Representative Strain | Accession number  | Number of strains | Free energy<br>ΔG | SbrB TT sequence                  |       |                                      |         |              |
|---------|-------------|---------------------------|-----------------------|-------------------|-------------------|-------------------|-----------------------------------|-------|--------------------------------------|---------|--------------|
|         |             |                           |                       |                   |                   |                   | Left arm                          | Loop  | Right arm                            | Poly U  |              |
| Con     | -           | -                         | MW2                   |                   | 9881              | -22.5             | GGCUCGCUCCCUGUAA                  | AAUUA | UUACGGGGGCGAGUU                      | UUAAUUU |              |
| V1      | G112A       | Mispairing                | 15981                 | -                 | 1                 | -17.1             | GGCUC                             | A     | CUCCCUGUAAAUUAUUACGGGGGCGAGUUUUAAUUU |         |              |
| V2      | C116U       | Wobble pair               | MN8                   | CM000952.1        | 478               | -19.7             | GGCUCGCUCU                        | U     | UGUAAAUUAUUACGGGGGCGAGUUUUAAUUU      |         |              |
| V3      | G132A       | Mispairing                | 3688STDY6124954       | FQJV01000002.1    | 1                 | -16.5             | GGCUCGCUCCCUGUAAAUUAUUACGG        | A     | GGCGAGUUUUAAUUU                      |         |              |
| V4      | G133Δ       | Mispairing                | RF122                 | CAACVQ010000005.1 | 6                 | -18.4             | GGCUCGCUCCCUGUAAAUUAUUACGGG       |       | CGAGUUUUAAUUU                        |         |              |
| V5      | G134::G     | Mispairing                | O267                  | CP034102.1        | 5                 | -19.8             | GGCUCGCUCCCUGUAAAUUAUUACGGGGG     | G     | CGAGUUUUAAUUU                        |         |              |
| V6      | C116U/G136A | Wobble pair / Mispairing  | MRSA                  | FKXV01000017.1    | 1                 | -13.7             | GGCUCGCUCU                        | U     | UGUAAAUUAUUACGGGGG                   | A       | AGUUUUAAUUU  |
| V7      | G138A       | Mispairing                | AL-699                | MOMP01000002.1    | 1                 | -18.2             | GGCUCGCUCCCUGUAAAUUAUUACGGGGGCGA  | A     | UUUUAAUUU                            |         |              |
| V8      | G136A       | Mispairing                | ST1464                | ANIT01000056.1    | 2                 | -16.5             | GGCUCGCUCCCUGUAAAUUAUUACGGGGG     | A     | AGUUUUAAUUU                          |         |              |
| V9      | C135U       | Wobble pair               | M6K146                | BECE01000002.1    | 1                 | -20.6             | GGCUCGCUCCCUGUAAAUUAUUACGGGG      | U     | GAGUUUUAAUUU                         |         |              |
| V10     | C116U/C135U | Wobble pair / Wobble pair | st1643                | FGNX01000021.1    | 1                 | -17.8             | GGCUCGCUCU                        | U     | UGUAAAUUAUUACGGGG                    | U       | GAGUUUUAAUUU |
| V11     | G133A       | Mispairing                | CM47                  | PZXG01000015.1    | 1                 | -23.4             | GGCUCGCUCCCUGUAAAUUAUUACGGG       | A     | GGCGAGUUUUAAUUU                      |         |              |
| V12     | C113U       | Wobble pair               | NA                    | FKLX01000001.1    | 1                 | -20.0             | GGCUCG                            | U     | UCCUGUAAAUUAUUACGGGGGCGAGUUUUAAUUU   |         |              |
| V13     | U139G       | Mispairing                | 1801-1 2010           | JOPS01000022.1    | 9                 | -21.2             | GGCUCGCUCCCUGUAAAUUAUUACGGGGGCGAG | G     | UUUAAUUU                             |         |              |
| V14     | G131U       | Mispairing                | USFL091               | CHEO01000001.1    | 1                 | -15.9             | GGCUCGCUCCCUGUAAAUUAUUACG         | U     | GGGCGAGUUUUAAUUU                     |         |              |
| V15     | A137G       | Wobble pair               | Lyso 2 2010           | JOPN01000025.1    | 1                 | -21.6             | GGCUCGCUCCCUGUAAAUUAUUACGGGGGCG   | G     | GUUUUAAUUU                           |         |              |
| V16     | A120G       | Wobble pair               | 364P                  | PDIS01000001.1    | 2                 | -22.6             | GGCUCGCUCCCUGU                    | G     | AAUUAUUACGGGGGCGAGUUUUAAUUU          |         |              |
| V17     | U139A       | Mispairing                | SA-085                | JXIF01000131.1    | 1                 | -21.1             | GGCUCGCUCCCUGUAAAUUAUUACGGGGGCGAG | A     | UUUAAUUU                             |         |              |
| V18     | U123C       | Loop                      | PN246B0               | PDVB01000142.1    | 1                 | -22.5             | GGCUCGCUCCCUGUAAA                 | C     | UAUUACGGGGGCGAGUUUUAAUUU             |         |              |
| V19     | C115A       | Mispairing                | CM184                 | PZTA01000041.1    | 1                 | -16.5             | GGCUCGCU                          | A     | CUGUAAAUUAUUACGGGGGCGAGUUUUAAUUU     |         |              |
| V20     | G130A       | WC pair                   | M6K137                | BEBZ01000007.1    | 1                 | -23.2             | GGCUCGCUCCCUGUAAAUUAUUAC          | A     | GGGGCGAGUUUUAAUUU                    |         |              |
| V21     | G138C       | Mispairing                | st1854                | FGTH01000001.1    | 1                 | -17.9             | GGCUCGCUCCCUGUAAAUUAUUACGGGGGCGA  | C     | UUUUAAUUU                            |         |              |
| V22     | U119C       | Mispairing                | GGMC6008              | JBOF01000002.1    | 1                 | -18.0             | GGCUCGCUCCCUG                     | C     | AAAUUAUUACGGGGGCGAGUUUUAAUUU         |         |              |

**Table S5. Supplementary excel file including the results of the genome-wide transcriptional terminator prediction and transcriptional read-through analysis in *Staphylococcus aureus*.** *In silico* predictions of intrinsic Rho-independent transcriptional terminators were performed by the TransTermHP v2.07 program as previously described (7) using the *S. aureus* NCTC 8325 genome (NC\_007795.1) as a reference. The  $\Delta G$  of predicted TTs was calculated using the Quickfold program (8). The level of the transcriptional read-through for each predicted TT, was calculated using our previous RNA sequencing data from the *S. aureus* 15981 strain (9). Predicted TTs are ordered according their read-through levels. Predicted TTs that were not included in the read-through ratio calculation are shown in grey characters (genes with transcription levels below 4).

## SUPPLEMENTARY FIGURES

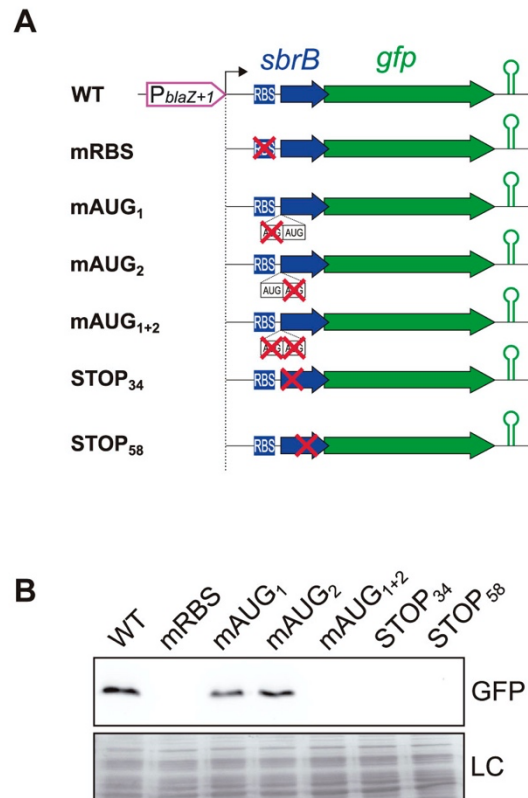

**Figure S1. Translational reporters showing the effect of *sbrB* mRNA mutations.** (A) Schematic representation of the different plasmids harbouring *sbrB* translation reporters. WT and mutant mRNAs were expressed under the control of the  $P_{blaZ+1}$  promoter. (B) Western blot analyses showing the GFP levels produced from the different plasmids. Membranes were incubated with monoclonal anti-GFP and developed with peroxidase-conjugated goat anti-mouse antibodies and a bioluminescence kit. Coomassie gel portions are included as loading controls (LC).

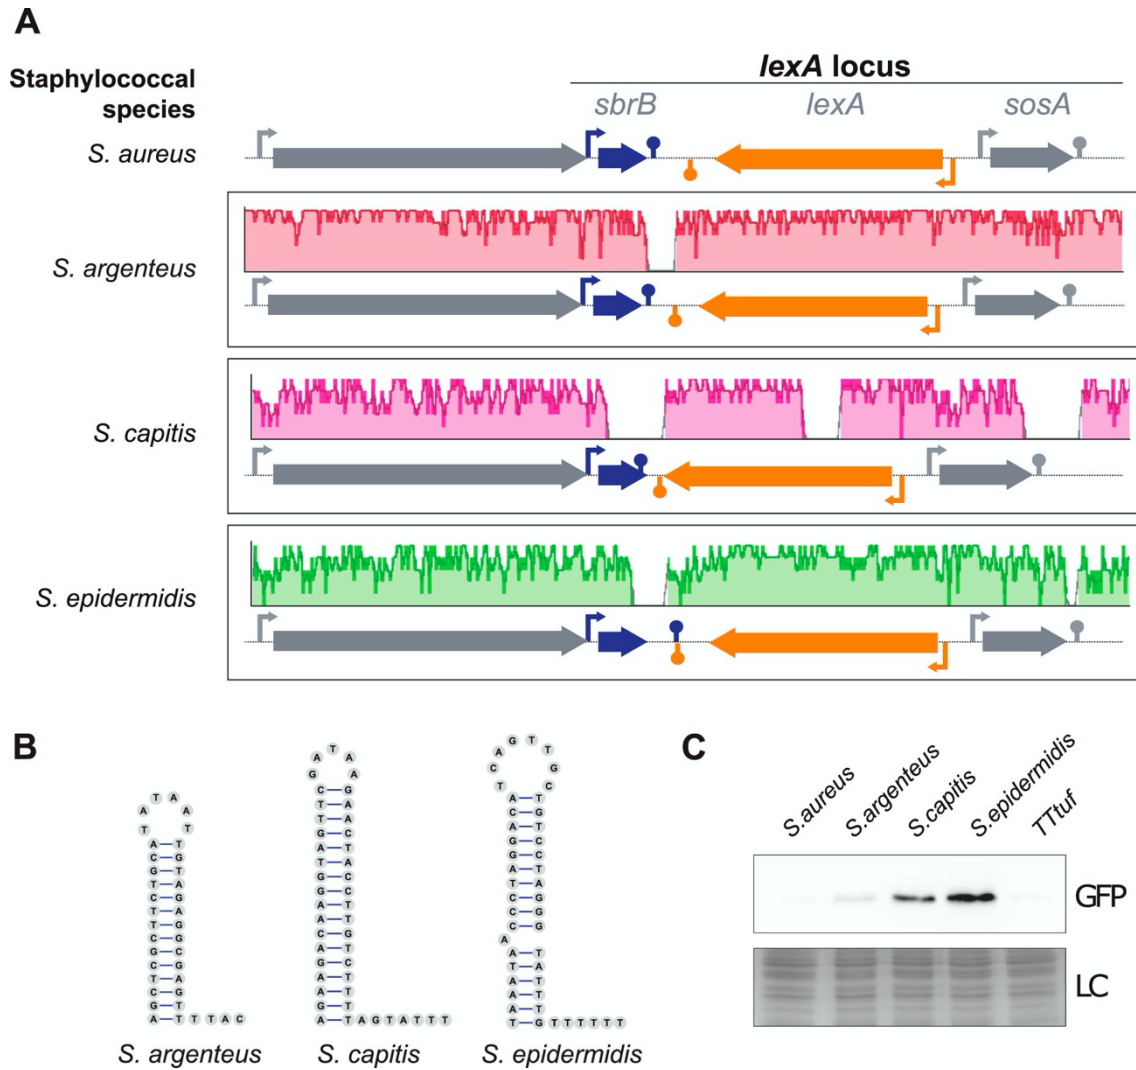

**Figure S2. TT<sub>sbrB</sub> is not conserved among staphylococcus species.** (A) Genomic comparison of the *sbrB-lexA-sosA* locus using Mauve, a multiple genome alignment tool (10). The conserved DNA regions when *S. aureus* is compared with *S. argenteus*, *S. capitis* and *S. epidermidis* are indicated in red, pink and green, respectively. (B) Transcriptional terminator structures of the *sbrB* mRNA from *S. argenteus*, *S. capitis* and *S. epidermidis* were predicted using RNAstructure (11). (C) Western Blot analysis showing the TT<sub>sbrB</sub> read-through levels. The *sbrB* mRNA from different staphylococcal species was cloned into the pRT-*gfp* plasmid and GFP levels were developed using monoclonal anti-GFP antibodies.

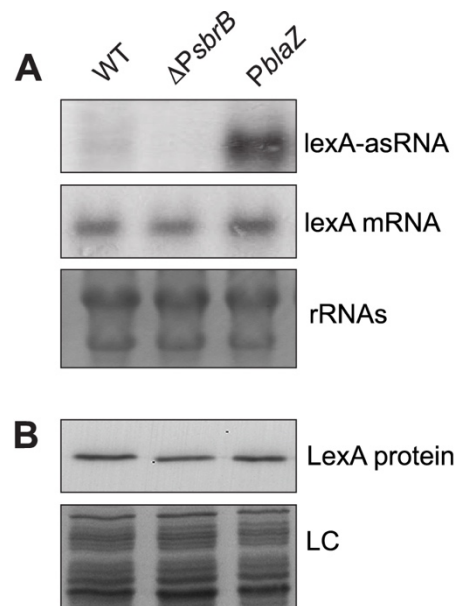

**Figure S3. Variations in the chromosomic *lexA*-asRNA levels do not influence LexA expression.** (A) Northern blot analysis showing the *lexA*-asRNA and *lexA* mRNA levels in the WT,  $\Delta PsbB$  and  $PblaZ$  strains. The indicated transcript levels were developed using specific  $^{32}\text{P}$ -radioactive labelled riboprobes. Ribosomal rRNAs stained with Midori Green were included as loading controls. (B) Western blot analysis showing the levels of the LexA protein expressed from the same strains, which were detected by using specific anti-LexA antibodies. Coomassie gel portions are included as loading controls (LC).

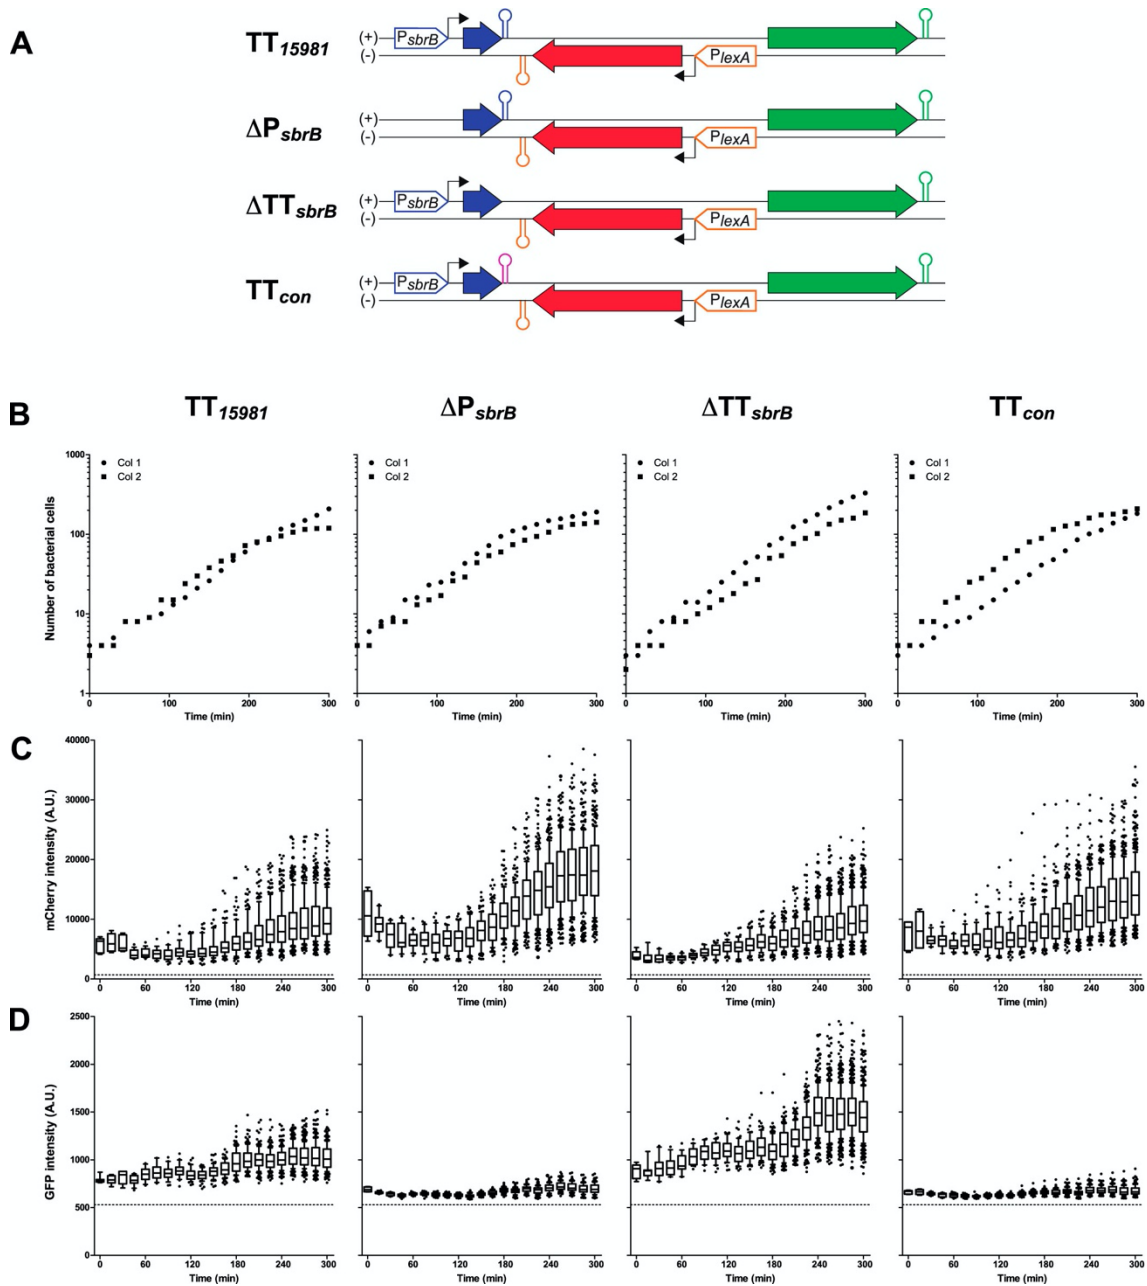

**Figure S4. Variations of *lexA*-asRNA levels affect the LexA reporter expression in *S. aureus* subpopulations.** (A) Schematic representation of dual fluorescent reporter plasmids used to monitor single cell expression in time-lapse fluorescence microscopy. (B) Number of bacteria per microcolony counted every 15 min. (C) Box plots showing the mCherry levels in each bacterial cell (D) Box plots showing the GFP levels in each bacterial cell. The strains transformed with the reporter plasmids carrying TT<sub>15981</sub>,  $\Delta$ P<sub>sbrB</sub>,  $\Delta$ TT<sub>sbrB</sub> and the TT<sub>con</sub> (TT from the MW2) variants were grown at 37°C in CellAsic microfluidic plates with a continuous flow of MHg and challenged with 30 mM of KOH during 4 hours. Images were taken in intervals of 15 min. mCherry and GFP intensities in single cells were quantified using the ROI statistics plugin of the Icy bioimage software (12) (<http://icy.bioimageanalysis.org>).

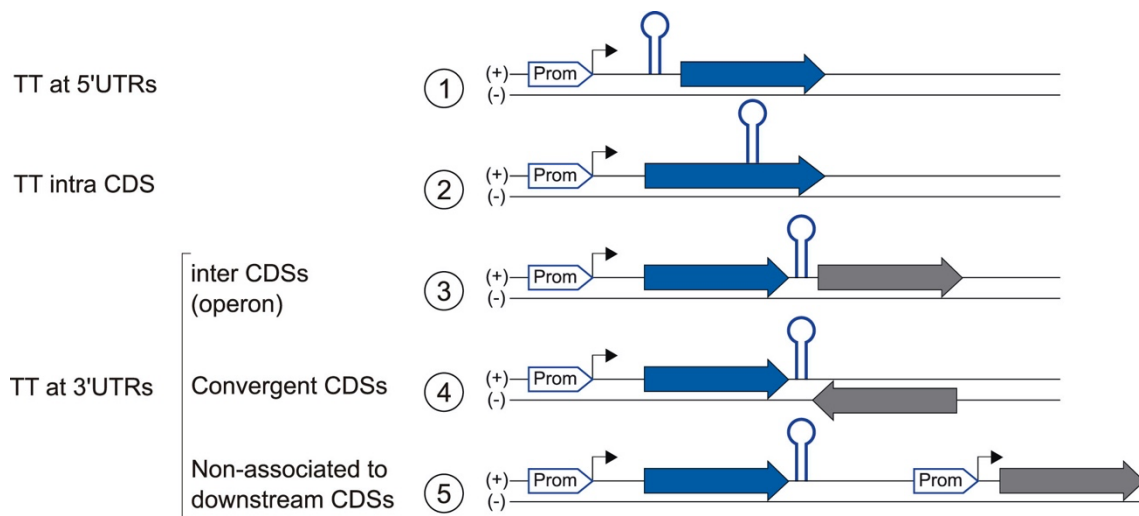

**Figure S5. Classification of predicted TTs according to their position relative to their corresponding CDS.** Predicted TTs could be located at the 5'UTRs (1), into a CDS region (2), between two CDSs of an operon (3), between convergent genes (4) and downstream of their corresponding CDSs without any association to downstream genes (5).



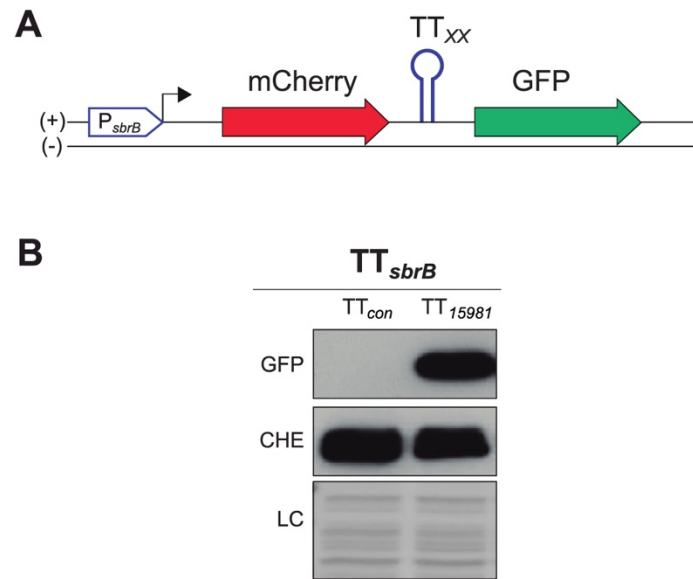

**Figure S6. Design of a dual fluorescent reporter plasmid for monitoring TREs. (A)** Schematic representation of the dual fluorescent reporter plasmid designed to monitor transcriptional terminator efficiencies. The expression of chimeric transcripts is controlled by the *P<sub>sbrB</sub>* promoter. **(B)** As controls, the transcriptional terminator efficiencies of the TT<sub>sbrB</sub> from *S. aureus* 15981 (TT<sub>15981</sub>) and MW2 (TT<sub>con</sub>) strains were monitored by Western blots as indicated in Figure 6. A coomassie stained gel portion is included as loading control.

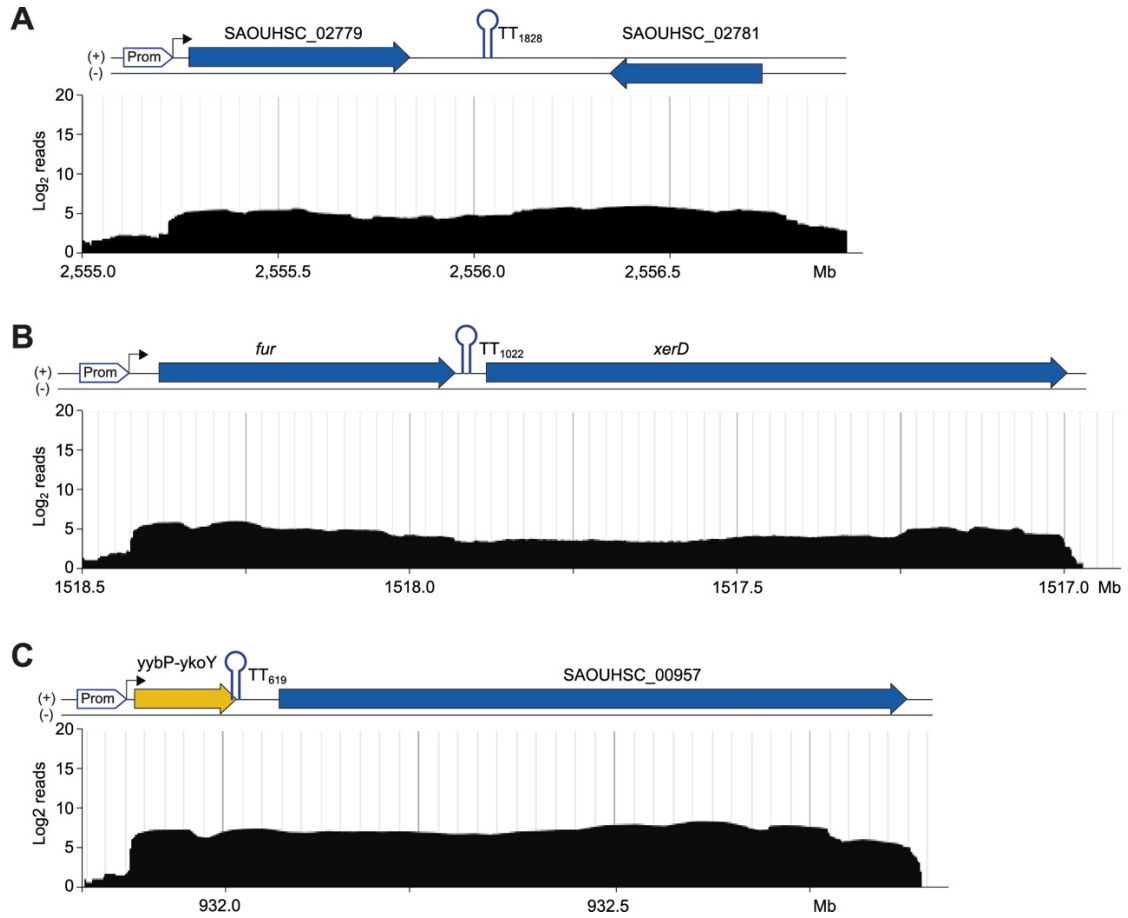

**Figure S7. Transcriptomic map of genomic regions included predicted TTs producing TREs.** Jbrowser images showing the transcript levels from SAOUHSC\_02779 (A), *fur* (B) and *yybP-ykoY* (C) chromosomal regions in the *S. aureus* 15981. The complete transcriptomic maps are available at <http://mamaps.unavarra.es> (9).

## SUPPLEMENTARY REFERENCES

1. Valle,J., Toledo-Arana,A., Berasain,C., Ghigo,J.-M., Amorena,B., Penadés,J.R. and Lasa,I. (2003) SarA and not sigma B is essential for biofilm development by *Staphylococcus aureus*. *Mol Microbiol*, **48**, 1075–1087.
2. Baba,T., Takeuchi,F., Kuroda,M., Yuzawa,H., Aoki,K.-I., Oguchi,A., Nagai,Y., Iwama,N., Asano,K., Naimi,T., *et al.* (2002) Genome and virulence determinants of high virulence community-acquired MRSA. *Lancet*, **359**, 1819–1827.
3. Arnaud,M., Chastanet,A. and Debarbouille,M. (2004) New vector for efficient allelic replacement in naturally nontransformable, low-GC-content, Gram-positive bacteria. *Appl Environ Microbiol*, **70**, 6887–6891.
4. Charpentier,E., Anton,A.I., Barry,P., Alfonso,B., Fang,Y. and Novick,R.P. (2004) Novel cassette-based shuttle vector system for gram-positive bacteria. *Appl Environ Microbiol*, **70**, 6076–6085.
5. Catalan-Moreno,A., Cela,M., Menendez-Gil,P., Irurzun,N., Caballero,C.J., Caldelari,I. and Toledo-Arana,A. (2021) RNA thermoswitches modulate *Staphylococcus aureus* adaptation to ambient temperatures. *Nucleic Acids Res*, **49**, 3409–3426.
6. Balestrino,D., Hamon,M.A., Dortet,L., Nahori,M.-A., Pizarro-Cerda,J., Alignani,D., Dussurget,O., Cossart,P. and Toledo-Arana,A. (2010) Single-cell techniques using chromosomally tagged fluorescent bacteria to study *Listeria monocytogenes* infection processes. *Appl Environ Microbiol*, **76**, 3625–3636.
7. Kingsford,C.L., Ayanbule,K. and Salzberg,S.L. (2007) Rapid, accurate, computational discovery of Rho-independent transcription terminators illuminates their relationship to DNA uptake. *Genome Biol*, **8**, R22.
8. Zuker,M. (2003) Mfold web server for nucleic acid folding and hybridization prediction. *Nucleic Acids Res*, **31**, 3406–3415.
9. Lasa,I., Toledo-Arana,A., Dobin,A., Villanueva,M., de los Mozos,I.R., Vergara-Irigaray,M., Segura,V., Fagegaltier,D., Penadés,J.R., Valle,J., *et al.* (2011) Genome-wide antisense transcription drives mRNA processing in bacteria. *Proc Natl Acad Sci USA*, **108**, 20172–20177.
10. Darling,A.C.E., Mau,B., Blattner,F.R. and Perna,N.T. (2004) Mauve: multiple alignment of conserved genomic sequence with rearrangements. *Genome Res*, **14**, 1394–1403.
11. Reuter,J.S. and Mathews,D.H. (2010) RNAstructure: software for RNA secondary structure prediction and analysis. *BMC Bioinformatics*, **11**, 129–9.
12. de Chaumont,F., Dallongeville,S., Chenouard,N., Hervé,N., Pop,S., Provoost,T., Meas-Yedid,V., Pankajakshan,P., Lecomte,T., Le Montagner,Y., *et al.* (2012) Icy: an open bioimage informatics platform for extended reproducible research. *Nat Meth*, **9**, 690–696.
